# Supplementary material for: Proteomic characterization of paired non-malignant and malignant African-American prostate epithelial cell lines distinguishes them by structural proteins
Source: Springer Nature journal article supplement (doi:10.1186/s12885-017-3462-7), 2017-07-11
Supplement: MOESM3 [file 13295264]

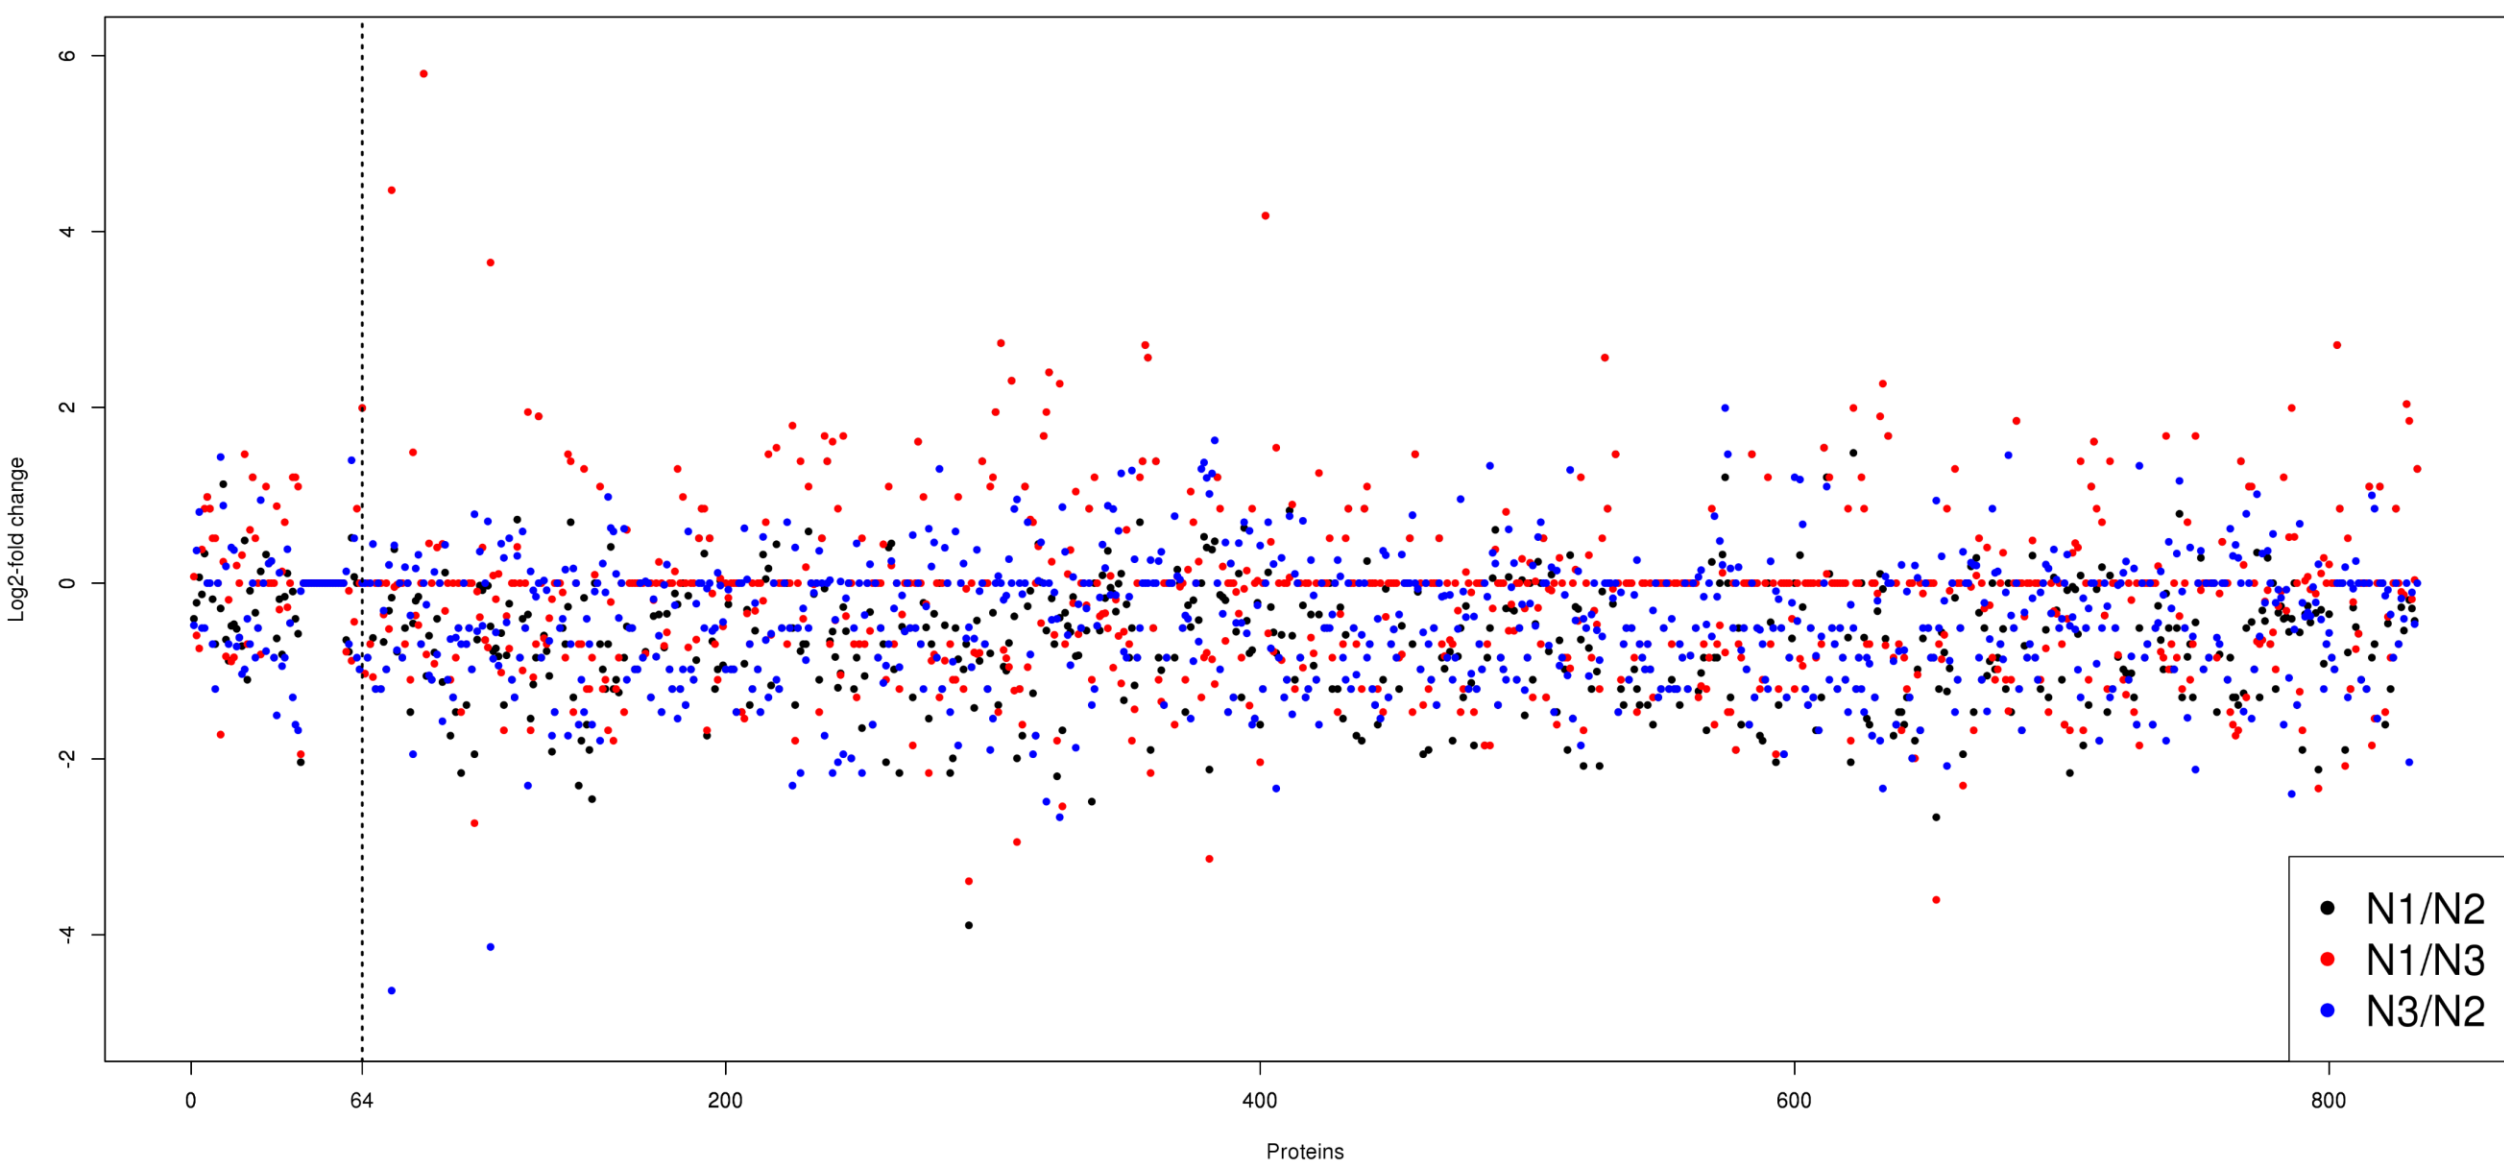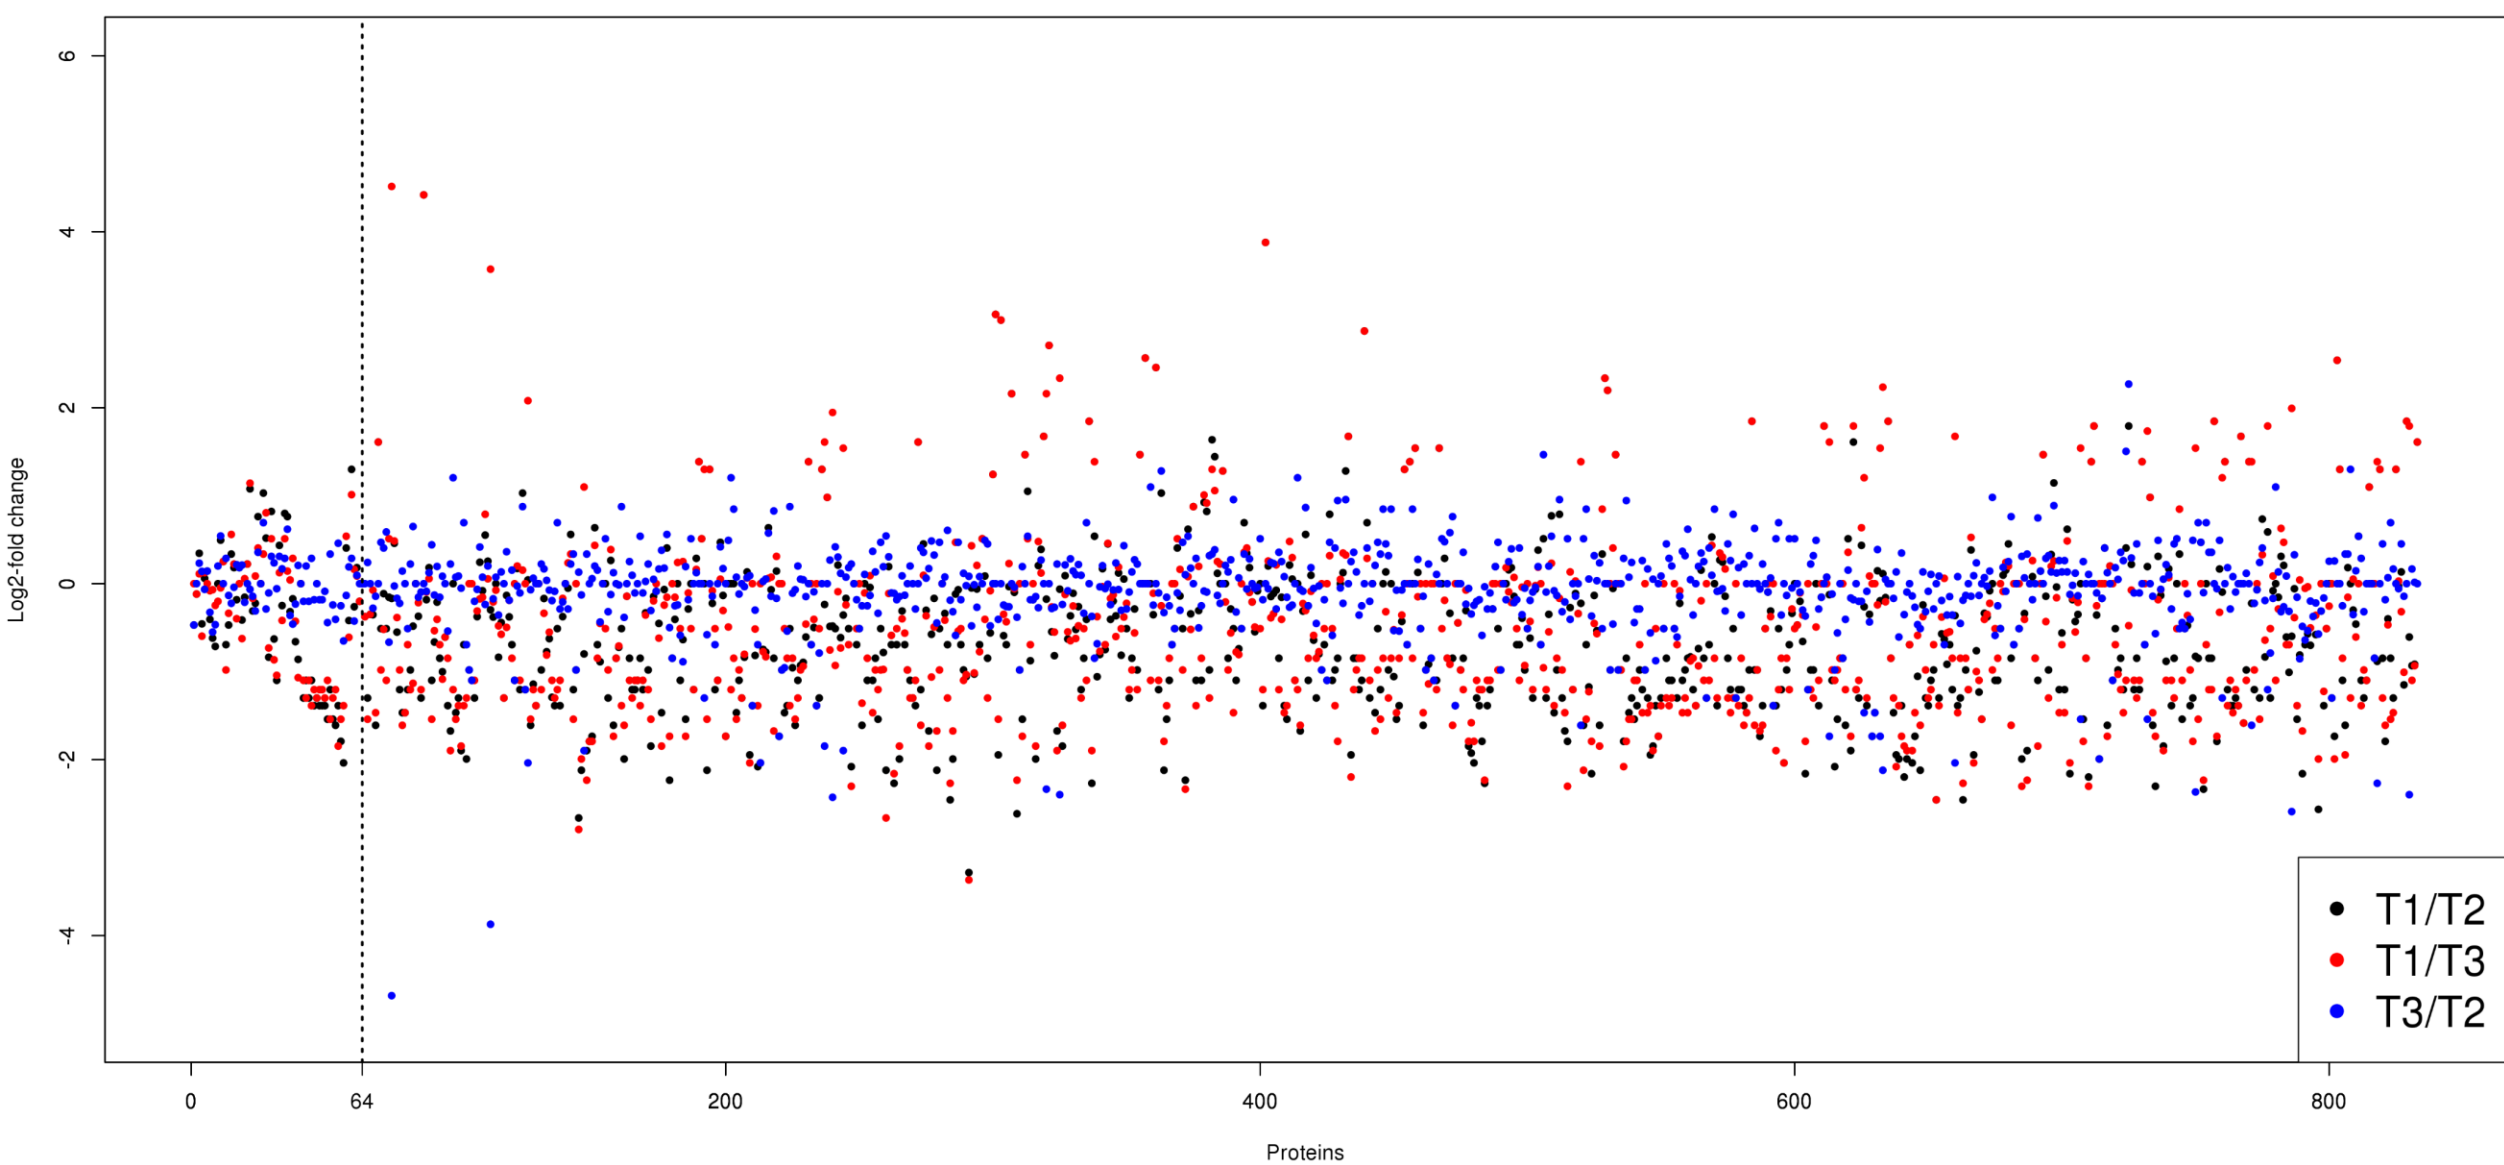

**Reproducibility of Protein Fold Changes Among Biological Replicates.** The log<sub>2</sub> fold changes were well controlled, and the majority of the proteins across biological replicates had log<sub>2</sub> fold change less than 2. Dots represent the log<sub>2</sub> fold change for each protein. N = normal, T= tumor, FC = fold change.
